# Supplementary material for: Influence of volatile anesthesia versus total intravenous anesthesia on chronic postsurgical pain after cardiac surgery using the Initiative on Methods, Measurement, and Pain Assessment in Clinical Trials criteria: study protocol for a prospective randomized controlled trial
Source: Springer Nature journal article supplement (doi:10.1186/s13063-019-3742-4), 2019-11-27
Supplement: MOESM2 [file 17440376]

|                             | STUDY PERIOD       |            |                |                   |       |       |          |          |         |
|-----------------------------|--------------------|------------|----------------|-------------------|-------|-------|----------|----------|---------|
|                             | Enrollment         | Allocation | Intervention   | Post-intervention |       |       |          |          |         |
| Time point                  | Preoperative visit | Allocation | During surgery | POD 1             | POD 2 | POD 3 | 3 months | 6 months | 1 years |
| <b>ENROLLMENT:</b>          |                    |            |                |                   |       |       |          |          |         |
| Eligibility screen          | ×                  |            |                |                   |       |       |          |          |         |
| Informed consent            | ×                  |            |                |                   |       |       |          |          |         |
| Demographic data            | ×                  |            |                |                   |       |       |          |          |         |
| Allocation                  |                    | ×          |                |                   |       |       |          |          |         |
| <b>INTERVENTIONS</b>        |                    |            | ×              |                   |       |       |          |          |         |
| Volatile anesthesia         |                    |            | ×              |                   |       |       |          |          |         |
| TIVA                        |                    |            | ×              |                   |       |       |          |          |         |
| Adverse events              |                    |            | ×              |                   |       |       |          |          |         |
| Surgery and anesthesia data |                    |            | ×              |                   |       |       |          |          |         |
| <b>ASSESSMENTS:</b>         |                    |            |                | ×                 | ×     | ×     | ×        | ×        | ×       |
| 11-point NRS scale          |                    |            |                | ×                 | ×     | ×     |          |          |         |
| Opioid consumption          |                    |            |                | ×                 | ×     | ×     |          |          |         |
| <b>IMPACT criteria</b>      |                    |            |                |                   |       |       | ×        | ×        | ×       |
| Brief pain inventory        |                    |            |                |                   |       |       | ×        | ×        | ×       |
| McGill questionnaire        |                    |            |                |                   |       |       | ×        | ×        | ×       |
| QoR-15 questionnaire        |                    |            |                |                   |       |       | ×        | ×        | ×       |
